# Supplementary material for: Long-term direct and indirect economic burden associated with osteoporotic fracture in US postmenopausal women
Source: PubMed Central journal article supplement — Osteoporos Int. 2021 Jan 7;32(6):1195–205. doi: 10.1007/s00198-020-05769-3 (PMC8128807; doi:10.1007/s00198-020-05769-3), 2021-01-07

# Long-term Direct and Indirect Economic Burden Associated with Osteoporotic Fracture in US Postmenopausal Women

*Osteoporosis International*

Oth Tran, Stuart Silverman, Xiaoqing Xu, Machaon Bonafede, Kathleen M. Fox, Michele McDermott, and Shrvanthi R. Gandra

**Corresponding Author:** Oth Tran, IBM Watson Health., 75 Binney St, Cambridge, MA 02142, otran@us.ibm.com

**Supplementary Figure 1:** Adjusted difference in healthcare costs for years 1-5 post-index between patients with vertebral fracture and their matched controls with (A) commercial or (B) Medicare insurance and between patients with non-hip non-vertebral fracture and their matched controls (C) commercial or (D) Medicare insurance

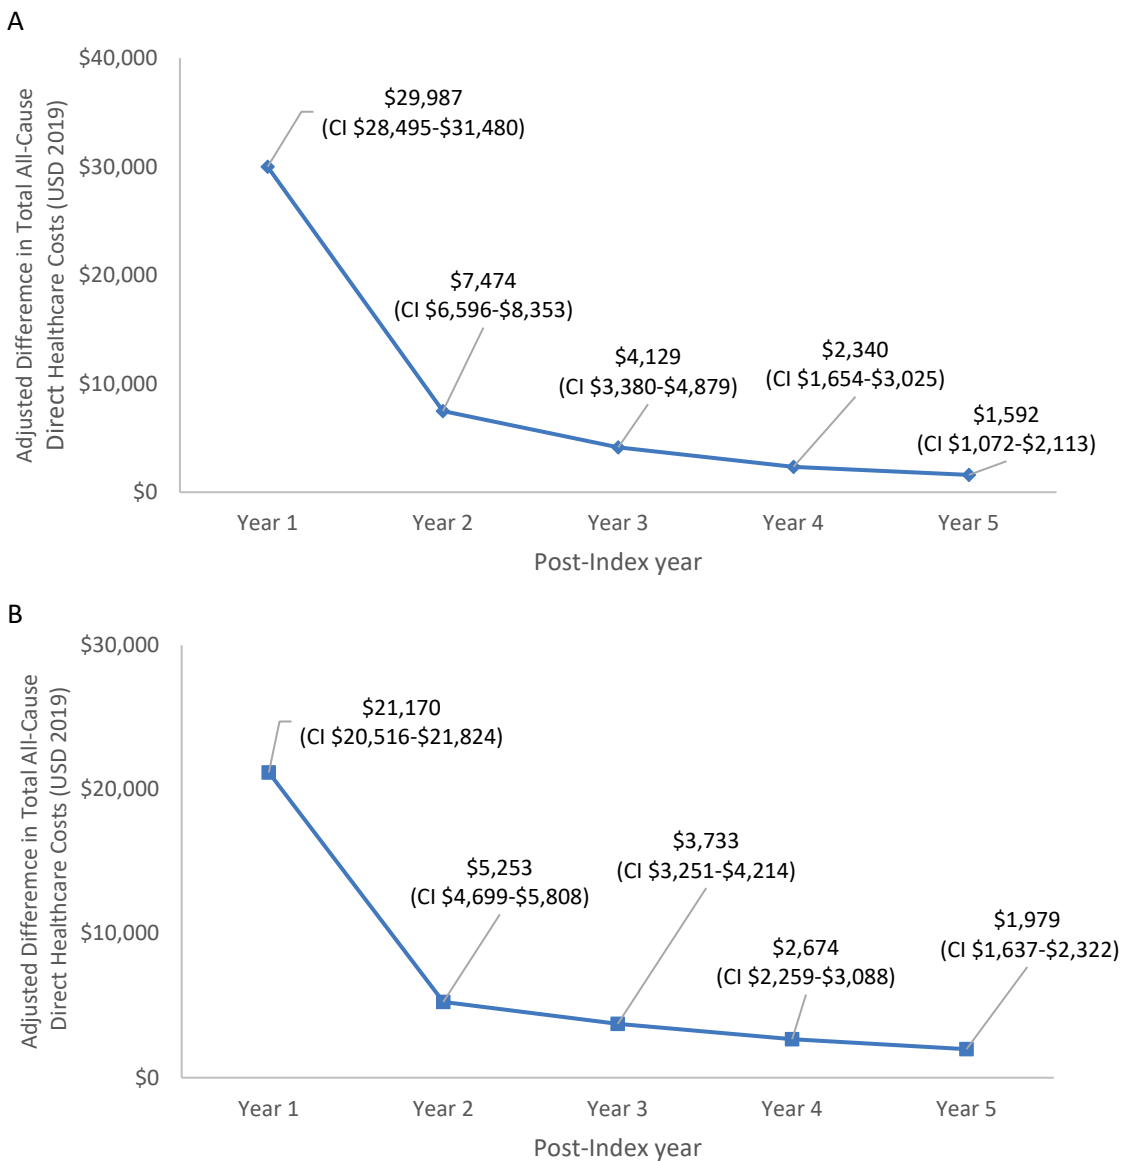

C

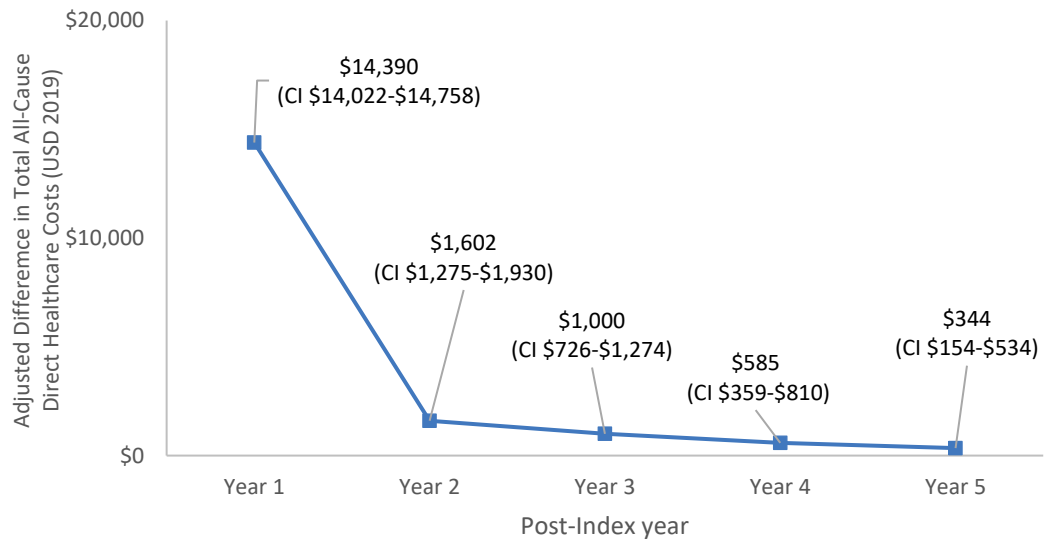

D

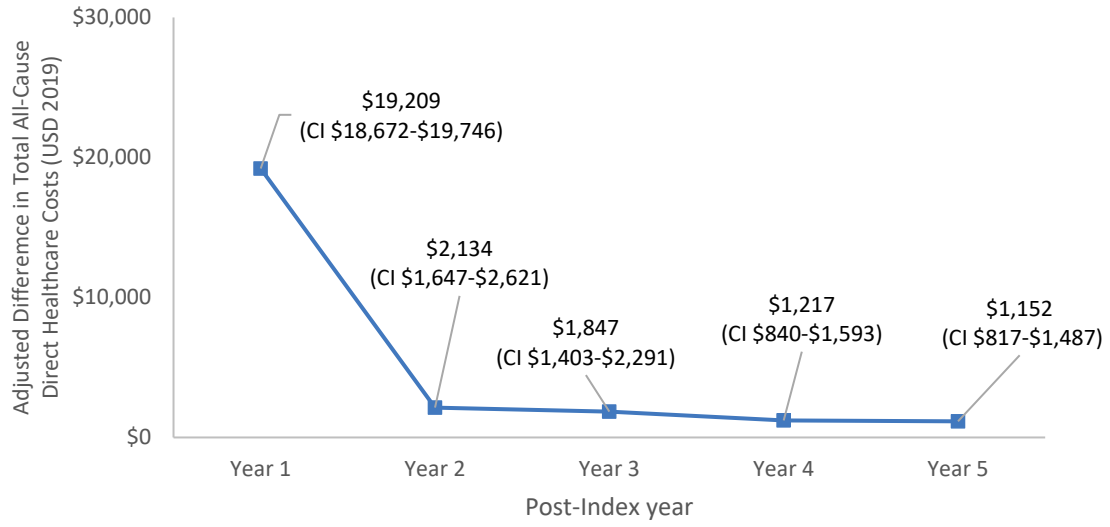

Supplement: 198_2020_5769_MOESM1_ESM.pdf [file 198_2020_5769_MOESM1_ESM.pdf]
