# Supplementary material for: Long-term direct and indirect economic burden associated with osteoporotic fracture in US postmenopausal women
Source: Springer Nature journal article supplement (doi:10.1007/s00198-020-05769-3), 2021-01-07
Supplement: MOESM2 [file 18746206]

**Long-term Direct and Indirect Economic Burden Associated with Osteoporotic Fracture in US Postmenopausal Women**

*Osteoporosis International*

Oth Tran, Stuart Silverman, Xiaoqing Xu, Machaon Bonafede, Kathleen M. Fox, Michele McDermott, and Shrvanathi R. Gandra

**Corresponding Author:** Oth Tran, IBM Watson Health., 75 Binney St, Cambridge, MA 02142, otran@us.ibm.com

**Supplementary Table 1:** Follow-up total all-cause healthcare costs of patients with vertebral and non-hip non-vertebral (NHNV) fractures and their matched controls during year 1 to year 5 post-index among commercially-insured and Medicare-insured patients. \*\*p<0.001

|                    |                   | Year 1                   | Year 2                   | Year 3                   | Year 4                   | Year 5                   |
|--------------------|-------------------|--------------------------|--------------------------|--------------------------|--------------------------|--------------------------|
| Vertebral Fracture |                   |                          |                          |                          |                          |                          |
| Commercial         | Fracture Patients | \$49,165<br>(\$95,332)   | \$25,540<br>(\$56,704)   | \$24,136<br>(\$56,954)   | \$23,509<br>(\$69,706)   | \$23,656<br>(\$58,159)   |
|                    | Controls          | \$9,561<br>(\$24,098)**  | \$10,004<br>(\$25,412)** | \$10,133<br>(\$23,837)** | \$9,854<br>(\$22,611)**  | \$10,869<br>(\$33,116)** |
| Medicare           | Fracture Patients | \$41,445<br>(\$64,455)   | \$25,588<br>(\$52,722)   | \$24,155<br>(\$40,755)   | \$24,981<br>(\$45,858)   | \$25,017<br>(\$44,097)   |
|                    | Controls          | \$14,229<br>(\$33,212)** | \$14,634<br>(\$31,334)** | \$14,804<br>(\$38,362)** | \$15,339<br>(\$38,033)** | \$14,995<br>(\$34,217)** |
| NHNV Fracture      |                   |                          |                          |                          |                          |                          |
| Commercial         | Fracture Patients | \$27,282<br>(\$47,949)   | \$14,008<br>(\$36,932)   | \$13,809<br>(\$39,276)   | \$13,373<br>(\$30,325)   | \$13,827<br>(\$34,442)   |
|                    | Controls          | \$9,549<br>(\$25,818)**  | \$9,774<br>(\$27,116)**  | \$10,080<br>(\$26,195)** | \$10,367<br>(\$28,888)** | \$10,632<br>(\$31,764)** |
| Medicare           | Fracture Patients | \$37,805<br>(\$57,341)   | \$20,437<br>(\$46,483)   | \$20,463<br>(\$47,029)   | \$19,846<br>(\$46,112)   | \$19,637<br>(\$49,255)   |
|                    | Controls          | \$14,273<br>(\$32,898)** | \$14,547<br>(\$33,228)** | \$14,833<br>(\$33,203)** | \$15,125<br>(\$35,069)** | \$14,441<br>(\$33,698)** |
