# Supplementary material for: Long-term direct and indirect economic burden associated with osteoporotic fracture in US postmenopausal women
Source: Springer Nature journal article supplement (doi:10.1007/s00198-020-05769-3), 2021-01-07
Supplement: MOESM3 [file 18746206]

## Long-term Direct and Indirect Economic Burden Associated with Osteoporotic Fracture in US Postmenopausal Women

*Osteoporosis International*

Oth Tran, Stuart Silverman, Xiaoqing Xu, Machaon Bonafede, Kathleen M. Fox, Michele McDermott, and Shrvanthi R. Gandra

**Corresponding Author:** Oth Tran, IBM Watson Health., 75 Binney St, Cambridge, MA 02142, otr@us.ibm.com

**Supplementary Table 2:** All-cause inpatient, skilled nursing facility (SNF), and outpatient (OP) prescription utilization and costs in years 2 through 5

|                                             | Year 2 Post Index      |                         | Year 3 Post Index      |                         | Year 4 Post Index      |                         | Year 5 Post Index     |                         |
|---------------------------------------------|------------------------|-------------------------|------------------------|-------------------------|------------------------|-------------------------|-----------------------|-------------------------|
|                                             | Fracture Patients      | Controls                | Fracture Patients      | Controls                | Fracture Patients      | Controls                | Fracture Patients     | Controls                |
| <b>Commercial hip fracture cohort</b>       | N=3,284                | N=3,284                 | N=2,005                | N=2,005                 | N=1,229                | N=1,229                 | N=754                 | N=754                   |
| Patients with an inpatient admission (N, %) | 738 (22.5)             | 192 (5.8)**             | 400 (20.0)             | 133 (6.6)**             | 238 (19.4)             | 73 (5.9)**              | 150 (19.9)            | 38 (5.0)**              |
| Admissions per patient (Mean, SD)           | 0.4 (1.1)              | 0.1 (0.4)**             | 0.4 (0.9)              | 0.1 (0.4)**             | 0.4 (1.0)              | 0.1 (0.3)**             | 0.3 (0.7)             | 0.1 (0.3)**             |
| Hospitalization days (Mean, SD)             | 1.3 (4.4)              | 0.2 (1.2)**             | 1.0 (3.0)              | 0.2 (1.2)**             | 1.0 (2.9)              | 0.3 (1.8)**             | 1.0 (3.5)             | 0.2 (0.8)**             |
| Inpatient costs (Mean, SD)                  | \$15,879<br>(\$92,120) | \$2,302<br>(\$15,124)** | \$11,040<br>(\$37,259) | \$2,440<br>(\$13,595)** | \$11,771<br>(\$46,592) | \$2,303<br>(\$14,416)** | \$8,148<br>(\$26,444) | \$1,402<br>(\$7,210)**  |
| Patients with a SNF visit (N, %)            | 205 (6.2)              | 13 (0.4)**              | 104 (5.2)              | 15 (0.7)**              | 73 (5.9)               | 3 (0.2)**               | 34 (4.5)              | 3 (0.4)**               |
| SNF costs (Mean, SD)                        | \$801 (\$4,796)        | \$78<br>(\$2,669)**     | \$795 (\$5,267)        | \$39 (\$630)**          | \$886 (\$5,327)        | \$61<br>(\$1,550)**     | \$619 (\$4,322)       | \$2 (\$31)**            |
| Patients with an OP prescription (N, %)     | 3,144 (95.7)           | 2,903 (88.4)**          | 1,882 (93.9)           | 1,780 (88.8)**          | 1,165 (94.8)           | 1,089 (88.6)**          | 710 (94.2)            | 665 (88.2)**            |
| OP prescription costs (Mean, SD)            | \$6,911<br>(\$16,922)  | \$2,313<br>(\$5,634)**  | \$6,634<br>(\$17,064)  | \$2,536<br>(\$7,782)**  | \$6,374<br>(\$13,768)  | \$2,648<br>(\$7,746)**  | \$6,462<br>(\$14,727) | \$2,452<br>(\$6,223)**  |
| <b>Commercial vertebral fracture cohort</b> | N=10,398               | N=10,398                | N=6,431                | N=6,431                 | N=4,019                | N=4,019                 | N=2,402               | N=2,402                 |
| Patients with an inpatient admission (N, %) | 1,442 (13.9)           | 556 (5.3)**             | 826 (12.8)             | 343 (5.3)**             | 480 (11.9)             | 206 (5.1)**             | 289 (12.0)            | 131 (5.5)**             |
| Admissions per patient (Mean, SD)           | 0.2 (0.7)              | 0.1 (0.3)**             | 0.2 (0.7)              | 0.1 (0.3)**             | 0.2 (0.7)              | 0.1 (0.3)**             | 0.2 (0.6)             | 0.1 (0.3)**             |
| Hospitalization days (Mean, SD)             | 0.6 (2.3)              | 0.2 (1.2)**             | 0.5 (2.1)              | 0.2 (1.4)**             | 0.5 (1.9)              | 0.2 (1.0)**             | 0.7 (2.9)             | 0.2 (1.2)**             |
| Inpatient costs (Mean, SD)                  | \$6,859<br>(\$35,921)  | \$2,100<br>(\$15,141)** | \$6,597<br>(\$33,574)  | \$1,916<br>(\$12,563)** | \$6,248<br>(\$48,931)  | \$1,946<br>(\$13,067)** | \$6,500<br>(\$33,574) | \$1,701<br>(\$11,029)** |
| Patients with a SNF visit (N, %)            | 181 (1.7)              | 25 (0.2)**              | 111 (1.7)              | 25 (0.4)**              | 79 (2.0)               | 17 (0.4)**              | 44 (1.8)              | 19 (0.8)**              |
| SNF costs (Mean, SD)                        | \$220 (\$4,028)        | \$13 (\$467)**          | \$218 (\$3,092)        | \$16 (\$413)**          | \$187 (\$2,180)        | \$17 (\$418)**          | \$151 (\$1,712)       | \$55 (\$848)**          |
| Patients with an OP prescription (N, %)     | 9,908 (95.3)           | 9,228 (88.7)**          | 6,104 (94.9)           | 5,744 (89.3)**          | 3,819 (95.0)           | 3,589 (89.3)**          | 2,275 (94.7)          | 2,145 (89.3)**          |
| OP prescription costs (Mean, SD)            | \$5,984<br>(\$14,729)  | \$2,257<br>(\$5,700)**  | \$5,582<br>(\$13,671)  | \$2,443<br>(\$7,087)**  | \$5,335<br>(\$13,396)  | \$2,388<br>(\$6,400)**  | \$5,605<br>(\$14,376) | \$2,548<br>(\$8,870)**  |

|                                             | Year 2 Post Index     |                         | Year 3 Post Index     |                         | Year 4 Post Index     |                         | Year 5 Post Index     |                         |
|---------------------------------------------|-----------------------|-------------------------|-----------------------|-------------------------|-----------------------|-------------------------|-----------------------|-------------------------|
|                                             | Fracture Patients     | Controls                |
| <b>Commercial NHNV fracture cohort</b>      | N=46,028              | N=46,028                | N=29,963              | N=29,963                | N=19,444              | N=19,444                | N=12,334              | N=12,334                |
| Patients with an inpatient admission (N, %) | 3,623 (7.9)           | 2,461 (5.3)**           | 2,253 (7.5)           | 1,556 (5.2)**           | 1,453 (7.5)           | 1,058 (5.4)**           | 905 (7.3)             | 634 (5.1)**             |
| Admissions per patient (Mean, SD)           | 0.1 (0.5)             | 0.1 (0.3)**             | 0.1 (0.5)             | 0.1 (0.3)**             | 0.1 (0.5)             | 0.1 (0.3)**             | 0.1 (0.4)             | 0.1 (0.3)**             |
| Hospitalization days (Mean, SD)             | 0.3 (1.7)             | 0.2 (1.3)**             | 0.3 (1.8)             | 0.2 (1.4)**             | 0.3 (1.7)             | 0.2 (1.2)**             | 0.3 (1.8)             | 0.2 (1.1)**             |
| Inpatient costs (Mean, SD)                  | \$3,218<br>(\$20,111) | \$1,928<br>(\$14,189)** | \$3,150<br>(\$19,975) | \$1,934<br>(\$13,072)** | \$2,830<br>(\$17,429) | \$2,100<br>(\$16,599)** | \$3,038<br>(\$21,071) | \$1,845<br>(\$14,021)** |
| Patients with a SNF visit (N, %)            | 398 (0.9)             | 198 (0.4)**             | 256 (0.9)             | 151 (0.5)**             | 159 (0.8)             | 97 (0.5)**              | 100 (0.8)             | 53 (0.4)**              |
| SNF costs (Mean, SD)                        | \$90 (\$1,705)        | \$28 (\$808)**          | \$87 (\$1,781)        | \$34 (\$929)**          | \$80 (\$1,523)        | \$38<br>(\$1,000)**     | \$96 (\$1,996)        | \$23 (\$841)**          |
| Patients with an OP prescription (N, %)     | 42,274 (91.8)         | 40,592<br>(88.2)**      | 27,557 (92.0)         | 26,490<br>(88.4)**      | 17,914 (92.1)         | 17,283<br>(88.9)**      | 11,382 (92.3)         | 10,973<br>(89.0)**      |
| OP prescription costs (Mean, SD)            | \$3,339<br>(\$13,618) | \$2,292<br>(\$6,408)**  | \$3,485<br>(\$21,798) | \$2,374<br>(\$6,725)**  | \$3,440<br>(\$10,078) | \$2,519<br>(\$7,992)**  | \$3,427<br>(\$10,364) | \$2,482<br>(\$7,262)**  |
| <b>Medicare hip fracture cohort</b>         | N=30,973              | N=30,973                | N=21,556              | N=21,556                | N=14,225              | N=14,225                | N=8,897               | N=8,897                 |
| Patients with an inpatient admission (N, %) | 9,967 (32.2)          | 6,024 (19.4)**          | 7,083 (32.9)          | 4,106 (19.0)**          | 4,537 (31.9)          | 2,678 (18.8)**          | 2,865 (32.2)          | 1,693 (19.0)**          |
| Admissions per patient (Mean, SD)           | 0.4 (0.7)             | 0.2 (0.6)**             | 0.4 (0.7)             | 0.2 (0.5)**             | 0.4 (0.7)             | 0.2 (0.6)**             | 0.4 (0.7)             | 0.2 (0.5)**             |
| Hospitalization days (Mean, SD)             | 1.6 (4.0)             | 0.9 (2.8)**             | 1.6 (3.5)             | 0.9 (3.7)**             | 1.6 (3.4)             | 0.9 (2.9)**             | 1.6 (3.2)             | 0.9 (2.6)**             |
| Inpatient costs (Mean, SD)                  | \$8,967<br>(\$27,751) | \$4,339<br>(\$25,490)** | \$8,798<br>(\$25,563) | \$4,249<br>(\$17,964)** | \$8,760<br>(\$28,190) | \$4,651<br>(\$30,053)** | \$8,848<br>(\$28,165) | \$4,488<br>(\$20,968)** |
| Patients with a SNF visit (N, %)            | 8,985 (29.0)          | 4,481 (14.5)**          | 6,377 (29.6)          | 3,160 (14.7)**          | 4,268 (30.0)          | 2,031 (14.3)**          | 2,727 (30.7)          | 1,245 (14.0)**          |
| SNF costs (Mean, SD)                        | \$3,827<br>(\$11,995) | \$1,321<br>(\$7,114)**  | \$3,871<br>(\$11,842) | \$1,322<br>(\$6,942)**  | \$3,995<br>(\$12,769) | \$1,308<br>(\$6,467)**  | \$4,431<br>(\$12,286) | \$1,414<br>(\$7,054)**  |
| Patients with an OP prescription (N, %)     | 29,313 (94.6)         | 27,976<br>(90.3)**      | 20,292 (94.1)         | 19,548<br>(90.7)**      | 13,395 (94.2)         | 13,005<br>(91.4)**      | 8,368 (94.1)          | 8,173 (91.9)**          |
| OP prescription costs (Mean, SD)            | \$3,987<br>(\$6,725)  | \$2,814<br>(\$4,246)**  | \$3,875<br>(\$7,121)  | \$2,770<br>(\$4,611)**  | \$3,816<br>(\$7,941)  | \$2,688<br>(\$4,747)**  | \$3,750<br>(\$7,505)  | \$2,561<br>(\$4,383)**  |
| <b>Medicare vertebral fracture cohort</b>   | N=30,102              | N=30,102                | N=20,719              | N=20,719                | N=13,756              | N=13,756                | N=8,562               | N=8,562                 |
| Patients with an inpatient admission (N, %) | 8,616 (28.6)          | 5,602 (18.6)**          | 5,858 (28.3)          | 3,778 (18.2)**          | 3,880 (28.2)          | 2,521 (18.3)**          | 2,512 (29.3)          | 1,573 (18.4)**          |
| Admissions per patient (Mean, SD)           | 0.4 (0.7)             | 0.2 (0.5)**             | 0.4 (0.7)             | 0.2 (0.5)**             | 0.4 (0.7)             | 0.2 (0.6)**             | 0.4 (0.7)             | 0.2 (0.6)**             |
| Hospitalization days (Mean, SD)             | 1.4 (3.7)             | 0.9 (2.8)**             | 1.3 (3.3)             | 0.8 (2.5)**             | 1.3 (3.1)             | 0.8 (2.4)**             | 1.4 (3.4)             | 0.8 (2.6)**             |
| Inpatient costs (Mean, SD)                  | \$7,526<br>(\$28,074) | \$4,338<br>(\$19,893)** | \$6,876<br>(\$21,203) | \$4,337<br>(\$26,792)** | \$7,259<br>(\$24,185) | \$4,523<br>(\$21,713)** | \$7,559<br>(\$23,963) | \$4,352<br>(\$17,173)** |
| Patients with a SNF visit (N, %)            | 5,346 (17.8)          | 3,744 (12.4)**          | 3,828 (18.5)          | 2,575 (12.4)**          | 2,703 (19.6)          | 1,683 (12.2)**          | 1,746 (20.4)          | 996 (11.6)**            |
| SNF costs (Mean, SD)                        | \$2,207<br>(\$9,048)  | \$1,155<br>(\$6,551)**  | \$2,142<br>(\$8,872)  | \$1,186<br>(\$7,063)**  | \$2,405<br>(\$9,034)  | \$1,213<br>(\$6,137)**  | \$2,499<br>(\$8,892)  | \$1,105<br>(\$5,873)**  |
| Patients with an OP prescription (N, %)     | 28,978 (96.3)         | 27,422<br>(91.1)**      | 19,858 (95.8)         | 18,936<br>(91.4)**      | 13,172 (95.8)         | 12,612<br>(91.7)**      | 8,198 (95.7)          | 7,871 (91.9)**          |

|                                             | Year 2 Post Index     |                         | Year 3 Post Index     |                         | Year 4 Post Index     |                         | Year 5 Post Index     |                         |
|---------------------------------------------|-----------------------|-------------------------|-----------------------|-------------------------|-----------------------|-------------------------|-----------------------|-------------------------|
|                                             | Fracture Patients     | Controls                |
| OP prescription costs (Mean, SD)            | \$4,921<br>(\$9,419)  | \$2,935<br>(\$4,975)**  | \$4,678<br>(\$9,493)  | \$2,802<br>(\$4,619)**  | \$4,535<br>(\$8,921)  | \$2,767<br>(\$5,268)**  | \$4,413<br>(\$9,111)  | \$2,710<br>(\$5,709)**  |
| <b>Medicare NHNV fracture cohort</b>        | N=32,987              | N=32,987                | N=23,264              | N=23,264                | N=15,831              | N=15,831                | N=10,362              | N=10,362                |
| Patients with an inpatient admission (N, %) | 7,188 (21.8)          | 5,690 (17.2)**          | 4,985 (21.4)          | 4,011 (17.2)**          | 3,249 (20.5)          | 2,658 (16.8)**          | 2,212 (21.3)          | 1,737 (16.8)**          |
| Admissions per patient (Mean, SD)           | 0.3 (0.6)             | 0.2 (0.5)**             | 0.3 (0.6)             | 0.2 (0.5)**             | 0.3 (0.6)             | 0.2 (0.5)**             | 0.3 (0.6)             | 0.2 (0.5)**             |
| Hospitalization days (Mean, SD)             | 1.0 (2.9)             | 0.8 (3.3)**             | 1.0 (2.7)             | 0.8 (2.7)**             | 1.0 (2.8)             | 0.8 (2.5)**             | 1.0 (2.6)             | 0.8 (2.5)**             |
| Inpatient costs (Mean, SD)                  | \$5,634<br>(\$23,735) | \$4,093<br>(\$20,007)** | \$5,863<br>(\$24,592) | \$4,288<br>(\$20,702)** | \$5,368<br>(\$24,552) | \$4,182<br>(\$18,492)** | \$5,590<br>(\$27,175) | \$3,869<br>(\$14,569)** |
| Patients with a SNF visit (N, %)            | 4,503 (13.7)          | 3,432 (10.4)**          | 3,258 (14.0)          | 2,329 (10.0)**          | 2,135 (13.5)          | 1,581 (10.0)**          | 1,442 (13.9)          | 982 (9.5)**             |
| SNF costs (Mean, SD)                        | \$1,571<br>(\$7,772)  | \$1,012<br>(\$5,962)**  | \$1,536<br>(\$7,529)  | \$980<br>(\$5,936)**    | \$1,574<br>(\$7,516)  | \$1,060<br>(\$6,563)**  | \$1,527<br>(\$7,036)  | \$852<br>(\$5,112)**    |
| Patients with an OP prescription (N, %)     | 31,313 (94.9)         | 30,189<br>(91.5)**      | 22,024 (94.7)         | 21,411<br>(92.0)**      | 14,991 (94.7)         | 14,666<br>(92.6)**      | 9,783 (94.4)          | 9,628 (92.9)**          |
| OP prescription costs (Mean, SD)            | \$3,974<br>(\$7,113)  | \$2,957<br>(\$5,039)**  | \$3,840<br>(\$6,861)  | \$2,922<br>(\$5,623)**  | \$3,709<br>(\$7,059)  | \$2,883<br>(\$5,798)**  | \$3,585<br>(\$6,596)  | \$2,832<br>(\$5,893)**  |
