# Supplementary material for: Long-term direct and indirect economic burden associated with osteoporotic fracture in US postmenopausal women
Source: Springer Nature journal article supplement (doi:10.1007/s00198-020-05769-3), 2021-01-07
Supplement: MOESM4 [file 18746206]

## Long-term Direct and Indirect Economic Burden Associated with Osteoporotic Fracture in US Postmenopausal Women

*Osteoporosis International*

Oth Tran, Stuart Silverman, Xiaoqing Xu, Machaon Bonafede, Kathleen M. Fox, Michele McDermott, and Shrvanthi R. Gandra

**Corresponding Author:** Oth Tran, IBM Watson Health., 75 Binney St, Cambridge, MA 02142, otran@us.ibm.com

**Supplementary Table 3:** Indirect costs from work absence and short-term disability (STD) among patients with hip, vertebral and non-hip non-vertebral (NHNV) fractures and their matched controls for years 1-5 post-index. \*p<0.05 \*\*p<0.001 Note: Data was not reported on cohorts smaller than 30 matched pairs (greyed boxes).

|                                                             | Hip Fracture          | Controls              | Vertebral Fracture   | Controls               | NHNV Fracture        | Controls               |
|-------------------------------------------------------------|-----------------------|-----------------------|----------------------|------------------------|----------------------|------------------------|
| <b>Year 1 Post Index</b>                                    |                       |                       |                      |                        |                      |                        |
| Patients with absence eligibility (N)                       | N = 35                | N = 35                | N = 145              | N = 145                | N = 782              | N = 782                |
| Patients with any workplace absence (N, %)                  | 29 (82.9)             | 31 (88.6)             | 128 (88.3)           | 130 (89.7)             | 694 (88.7)           | 678 (86.7)             |
| Days lost due to workplace absence (Mean, SD)               | 52.8 (44.5)           | 32.5 (21.6)*          | 45.2 (40.4)          | 31.9 (21.9)**          | 41.7 (32.8)          | 29.8 (19.3)**          |
| Indirect costs associated with workplace absence (Mean, SD) | \$11,176<br>(\$9,635) | \$6,871<br>(\$4,697)* | \$9,548<br>(\$8,471) | \$6,814<br>(\$5,038)** | \$8,790<br>(\$7,003) | \$6,279<br>(\$4,205)** |
| Patients with STD eligibility (N)                           | N = 219               | N = 219               | N = 981              | N = 981                | N = 4771             | N = 4771               |
| Patients with any STD (N, %)                                | 139 (63.5)            | 14 (6.4)**            | 365 (37.2)           | 89 (9.1)**             | 1876 (39.3)          | 413 (8.7)              |
| Days lost due to STD (Mean, SD)                             | 46.3 (50.1)           | 3.2 (15.5)**          | 25.3 (45.7)          | 4.4 (20.6)**           | 22.6 (38.4)          | 3.7 (17.6)             |
| Indirect costs associated with STD (Mean, SD)               | \$6,693<br>(\$7,209)  | \$485<br>(\$2,392)**  | \$3,737<br>(\$6,891) | \$645<br>(\$3,084)**   | \$3,312<br>(\$5,684) | \$539<br>(\$2,614)**   |
| <b>Year 2 Post Index</b>                                    |                       |                       |                      |                        |                      |                        |
| Patients with absence eligibility (N)                       | N < 30                | N < 30                | N = 103              | N = 103                | N = 579              | N = 579                |
| Patients with any workplace absence (N, %)                  |                       |                       | 89 (86.4)            | 94 (91.3)              | 513 (88.6)           | 511 (88.3)             |
| Days lost due to workplace absence (Mean, SD)               |                       |                       | 33.4 (26.0)          | 32.5 (18.4)            | 31.6 (20.5)          | 30.4 (18.5)            |
| Indirect costs associated with workplace absence (Mean, SD) |                       |                       | \$7,059<br>(\$5,530) | \$6,933<br>(\$4,225)   | \$6,642<br>(\$4,406) | \$6,399<br>(\$4,006)   |
| Patients with STD eligibility (N)                           | N = 132               | N = 132               | N = 599              | N = 599                | N = 3196             | N = 3196               |
| Patients with any STD (N, %)                                | 27 (20.5)             | 15 (11.4)*            | 84 (14.0)            | 51 (8.5)*              | 331 (10.4)           | 267 (8.4)*             |
| Days lost due to STD (Mean, SD)                             | 10.2 (30.0)           | 4.6 (17.0)            | 7.1 (23.8)           | 4.2 (19.5)*            | 4.8 (20.0)           | 3.6 (18.2)*            |

|                                                             | Hip Fracture         | Controls             | Vertebral Fracture   | Controls             | NHNV Fracture        | Controls              |
|-------------------------------------------------------------|----------------------|----------------------|----------------------|----------------------|----------------------|-----------------------|
| Indirect costs associated with STD (Mean, SD)               | \$1,447<br>(\$4,163) | \$683 (\$2,549)      | \$1,036<br>(\$3,539) | \$614<br>(\$2,895)*  | \$706 (\$2,986)      | \$548<br>(\$2,810)*   |
| Year 3 Post Index                                           |                      |                      |                      |                      |                      |                       |
| Patients with absence eligibility (N)                       | N < 30               | N < 30               | N = 62               | N = 62               | N = 416              | N = 416               |
| Patients with any workplace absence (N, %)                  |                      |                      | 52 (83.9)            | 56 (90.3)            | 370 (88.9)           | 369 (88.7)            |
| Days lost due to workplace absence (Mean, SD)               |                      |                      | 33.7 (30.4)          | 32.5 (14.5)          | 32.7 (20.3)          | 29.9 (19.1)*          |
| Indirect costs associated with workplace absence (Mean, SD) |                      |                      | \$7,014<br>(\$6,121) | \$6,851<br>(\$3,179) | \$6,902<br>(\$4,435) | \$6,299<br>(\$4,141)* |
| Patients with STD eligibility (N)                           | N = 68               | N = 68               | N = 334              | N = 334              | N = 1936             | N = 1936              |
| Patients with any STD (N, %)                                | 7 (10.3)             | 6 (8.8)              | 52 (15.6)            | 24 (7.2)**           | 234 (12.1)           | 170 (8.8)*            |
| Days lost due to STD (Mean, SD)                             | 2.6 (9.6)            | 6.6 (26.2)           | 9.0 (29.2)           | 3.7 (19.7)*          | 5.8 (22.7)           | 4.5 (20.8)            |
| Indirect costs associated with STD (Mean, SD)               | \$356 (\$1,285)      | \$1,018<br>(\$4,018) | \$1,311<br>(\$4,139) | \$517<br>(\$2,861)*  | \$868 (\$3,485)      | \$663 (\$3,121)       |
| Year 4 Post Index                                           |                      |                      |                      |                      |                      |                       |
| Patients with absence eligibility (N)                       | N < 30               | N < 30               | N = 43               | N = 43               | N = 268              | N = 268               |
| Patients with any workplace absence (N, %)                  |                      |                      | 37 (86.0)            | 41 (95.3)            | 243 (90.7)           | 244 (91.0)            |
| Days lost due to workplace absence (Mean, SD)               |                      |                      | 32.1 (23.9)          | 31.4 (10.6)          | 32.7 (19.8)          | 32.3 (18.9)           |
| Indirect costs associated with workplace absence (Mean, SD) |                      |                      | \$6,659<br>(\$4,801) | \$6,558<br>(\$2,324) | \$6,867<br>(\$4,250) | \$6,755<br>(\$4,106)  |
| Patients with STD eligibility (N)                           | N < 30               | N < 30               | N = 195              | N = 195              | N = 1069             | N = 1069              |
| Patients with any STD (N, %)                                | 6 (17.1)             | 5 (14.3)             | 34 (17.4)            | 7 (3.6)**            | 142 (13.3)           | 97 (9.1)*             |
| Days lost due to STD (Mean, SD)                             | 13.1 (39.3)          | 10.3 (32.6)          | 6.2 (18.5)           | 1.6 (12.9)*          | 5.5 (20.6)           | 4.5 (20.7)            |
| Indirect costs associated with STD (Mean, SD)               | \$1,853<br>(\$5,697) | \$1,569<br>(\$4,987) | \$882 (\$2,596)      | \$236<br>(\$1,907)*  | \$816 (\$3,104)      | \$662 (\$3,092)       |
| Year 5 Post Index                                           |                      |                      |                      |                      |                      |                       |
| Patients with absence eligibility (N)                       | N < 30               | N < 30               | N = 31               | N = 31               | N = 152              | N = 152               |
| Patients with any workplace absence (N, %)                  |                      |                      | 28 (90.3)            | 30 (96.8)            | 134 (88.2)           | 138 (90.8)            |
| Days lost due to workplace absence (Mean, SD)               |                      |                      | 37.0 (21.4)          | 35.9 (16.4)          | 32.9 (26.2)          | 32.0 (18.2)           |
| Indirect costs associated with workplace absence (Mean, SD) |                      |                      | \$7,602<br>(\$4,378) | \$7,400<br>(\$3,428) | \$6,943<br>(\$5,807) | \$6,664<br>(\$3,746)  |

|                                               | Hip Fracture | Controls | Vertebral Fracture   | Controls            | NHNV Fracture        | Controls        |
|-----------------------------------------------|--------------|----------|----------------------|---------------------|----------------------|-----------------|
| Patients with STD eligibility (N)             | N < 30       | N < 30   | N = 92               | N = 92              | N = 560              | N = 560         |
| Patients with any STD (N, %)                  |              |          | 23 (25.0)            | 13 (14.1)           | 79 (14.1)            | 71 (12.7)       |
| Days lost due to STD (Mean, SD)               |              |          | 10.4 (26.2)          | 3.7 (10.9)*         | 8.2 (29.1)           | 5.6 (21.2)      |
| Indirect costs associated with STD (Mean, SD) |              |          | \$1,543<br>(\$3,891) | \$555<br>(\$1,674)* | \$1,220<br>(\$4,446) | \$830 (\$3,170) |
